# Supplementary material for: Dual role of neutrophils in modulating liver injury and fibrosis during development and resolution of diet-induced murine steatohepatitis
Source: PubMed Central journal article supplement (PMC8683497; doi:10.1038/s41598-021-03679-w), 2021-12-17
Supplement: 41598_2021_3679_MOESM1_ESM.pdf [file 41598_2021_3679_MOESM1_ESM.pdf]

## SUPPLEMENTARY INFORMATION

### **Dual role of neutrophils in modulating liver injury and fibrosis during development and resolution of diet-induced murine steatohepatitis**

Andrea D. Kim ([adk002@health.ucsd.edu](mailto:adk002@health.ucsd.edu))<sup>1+</sup>, Sung Eun Kim ([sekim@hallym.or.kr](mailto:sekim@hallym.or.kr))<sup>2, 3+</sup>, Aleksandra Leszczynska ([aleszczynska@health.ucsd.edu](mailto:aleszczynska@health.ucsd.edu))<sup>1</sup>, Benedikt Kaufmann ([bkaufmann@health.ucsd.edu](mailto:bkaufmann@health.ucsd.edu))<sup>1,4</sup>, Agustina Reca ([areca@health.ucsd.edu](mailto:areca@health.ucsd.edu))<sup>1</sup>, Dong Joon Kim ([djkim@hallym.ac.kr](mailto:djkim@hallym.ac.kr))<sup>2, 3</sup>, Ariel E. Feldstein ([afeldstein@ucsd.edu](mailto:afeldstein@ucsd.edu))<sup>1\*</sup>.

<sup>1</sup>Department of Pediatrics, University of California San Diego, La Jolla, USA

<sup>2</sup>Department of Internal Medicine, Hallym University College of Medicine, Chuncheon, Republic of Korea

<sup>3</sup>Institute for Liver and Digestive Diseases, Hallym University, Chuncheon, Republic of Korea

<sup>4</sup>Department of Surgery, TUM School of Medicine, Klinikum rechts der Isar, Technical, University of Munich, Munich, Germany

<sup>+</sup>Contributed equally.

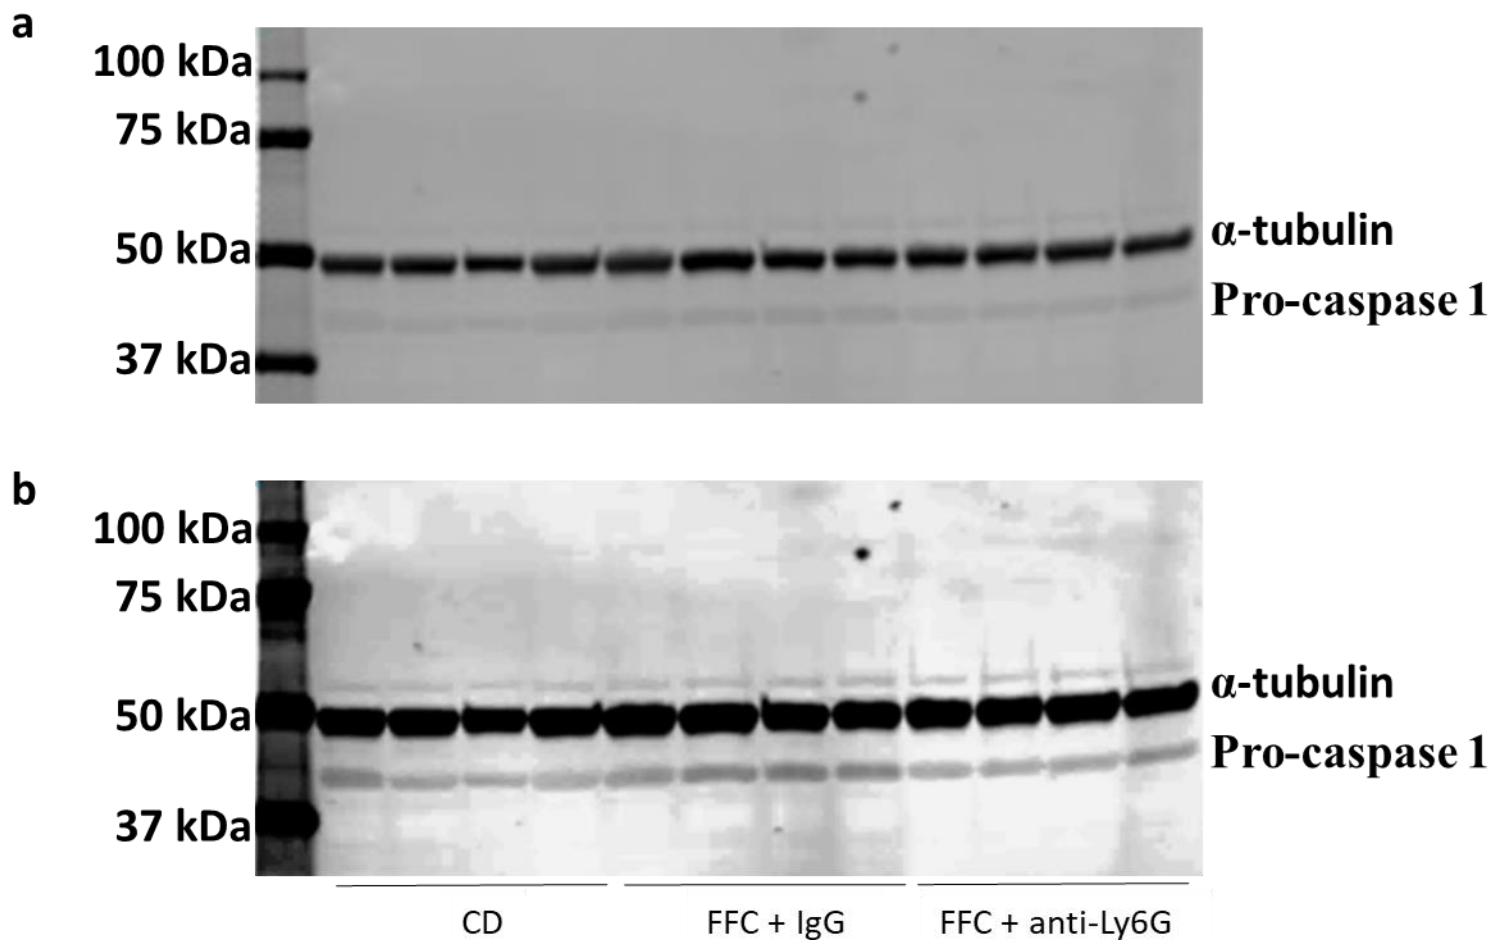

**SUPPLEMENTARY FIG. 1:** Full length Western Blot for detection of pro-caspase-1 in whole liver tissue of mice fed with Control Diet (CD) or high fat-fructose-cholesterol (FFC) diet in association with either IgG (FFC + IgG) or anti-Ly6G (FFC + anti-Ly6G) antibodies administration. (a) Western blotting for detection of pro-caspase-1 was performed. Active caspase-1 was not visualized, unlike precursor procaspase 1 (MW: 46 kDa).  $\alpha$ -tubulin (MW: 53 kDa) was used as housekeeping control. (b) Higher resolution and exposure levels were adjusted for a better visualization of the pro-caspase 1 band.

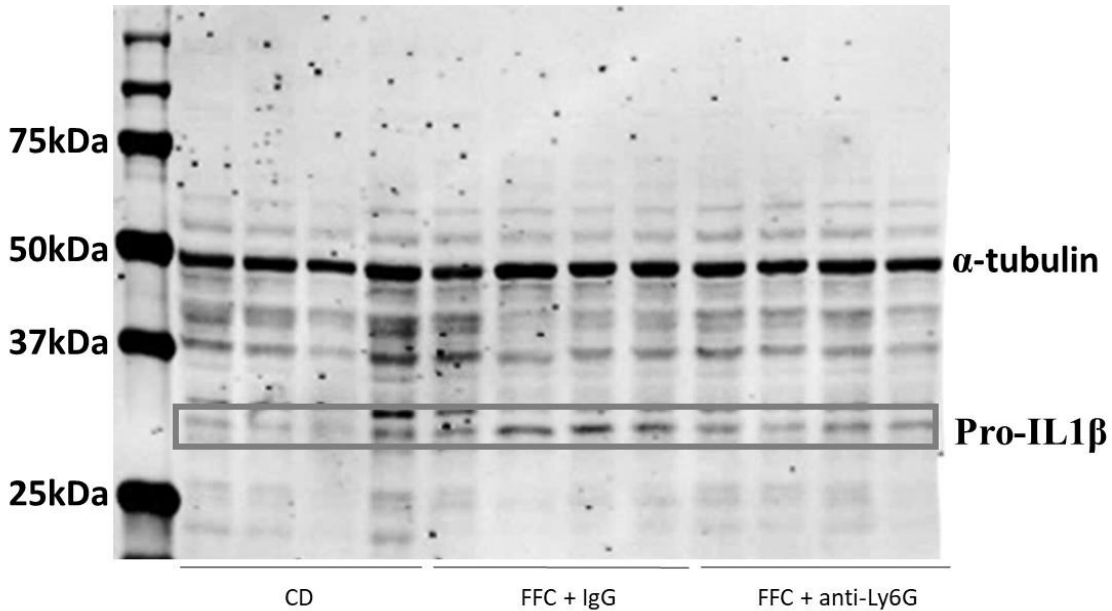

**SUPPLEMENTARY FIG. 2:** Full length Western Blot for detection of pro-IL-1 $\beta$  in whole liver tissue of mice fed with CD or FFC diet in association with either IgG or anti-Ly6G antibodies administration. (a) Western blotting for detection of pro-IL-1 $\beta$  was performed. Active IL-1 $\beta$  was not visualized, unlike precursor pro- IL-1 $\beta$  (MW: 31 kDa). Detection of  $\alpha$ -tubulin (MW: 53 kDa) was used as housekeeping control.

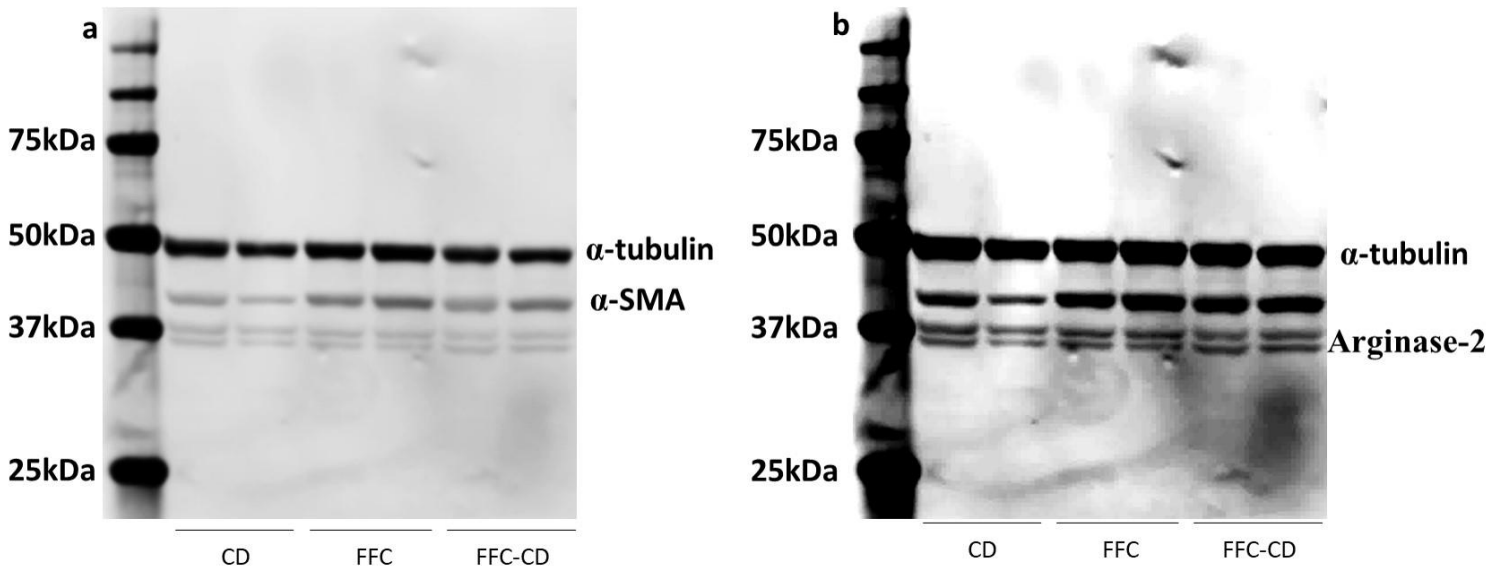

**SUPPLEMENTARY FIG. 3:** Full-length Western Blot for detection of alpha smooth muscle actin ( $\alpha$ -SMA) and arginase-2 in whole liver tissue of mice fed with CD, FFC diet or FFC diet with a reversal into control diet (FFC-CD, allowing spontaneous inflammation resolution). (a) Western blotting for detection of  $\alpha$ -SMA (MW: 42 kDa) and arginase-2 (MW: 35 kDa) was performed. Detection of  $\alpha$ -tubulin (MW: 53 kDa) was used as housekeeping control. (b) Higher exposure was adjusted for a better visualization of arginase-2 band.

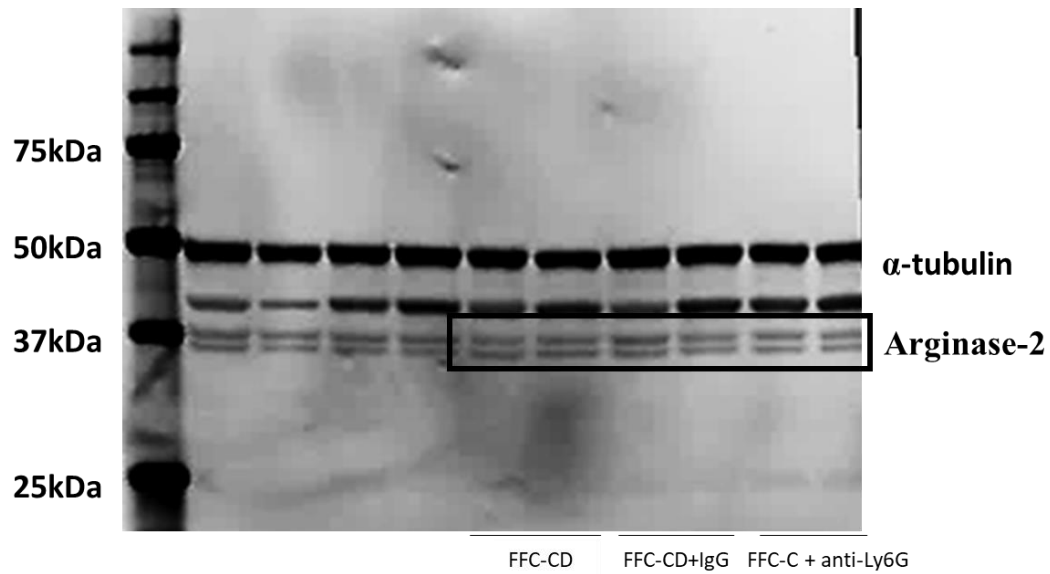

**SUPPLEMENTARY FIG. 4:** Full-length Western Blot for detection of arginase-2 was performed in whole liver tissue of mice treated with a diet reversal into control diet (FFC-CD, allowing spontaneous inflammation resolution) alone or in association of either IgG (FFC-CD + IgG) or anti-Ly6G antibodies (FFC-CD + anti-Ly6G) administration. (a) Western blotting for detection of arginase-2 (MW: 35 kDa) was performed. Detection of  $\alpha$ -tubulin (MW: 53 kDa) was used as housekeeping control.

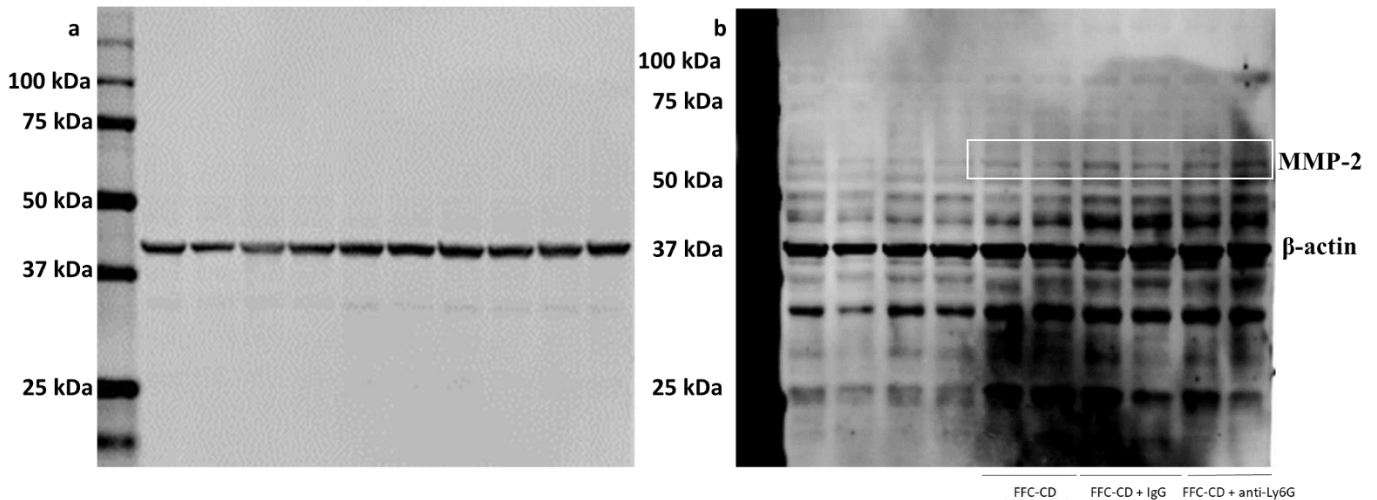

**SUPPLEMENTARY FIG. 5:** Full-length Western Blot for detection of matrix metalloproteinase-2 (MMP2) in whole liver tissue of mice that underwent diet reversal into control diet alone (FFC-CD, allowing spontaneous inflammation resolution) or in association of either IgG or anti-Ly6G antibodies administration. (a) Western blotting for detection of MMP-2 (predicted MW: 74 kDa) was performed. Detection of  $\beta$ -actin (MW: 43 kDa) was used as housekeeping control. (b) Higher resolution scanning and increased exposure was adjusted for a better visualization of the MMP-2 band.
